# Supplementary material
Source: publisher figshare collection journal article supplement (https://gsapubs.figshare.com/articles/dataset/_/28939118)
Supplement: Supplementary file 1 [file 1]

## Sheet: Sheet1
Table S1. LA-ICP-MS results for zircons U-Pb ages of samples from the study area, the Xiaohongshilazi Pb-Zn ore district of central Jilin Province, Northeast China
Analysis Spot	Th (ppm)	U (ppm)	Th/U	Isotopic ratios						Apperent ages (Ma)
				206Pb/238U	1σ	207Pb/235U	1σ	207Pb/206Pb	1σ	206Pb/238U	1σ	207Pb/235U	1σ	207Pb/206Pb	1σ
370M1-16TW1 - 1	58.5373	45.5379	1.28546	0.336466	0.00427438	6.23511	0.119838	0.134018	0.002441	1869.65	20.6174	2009.39	16.8197	2151.54	31.4825
370M1-16TW1 - 2	676.255	597.329	1.13213	0.0409912	0.00059228	0.3183	0.00850009	0.0561952	0.00160416	258.974	3.66774	280.594	6.54704	461.155	62.9575
370M1-16TW1 - 3	210.299	362.592	0.579988	0.0405236	0.000622111	0.519725	0.0191509	0.0928086	0.00342603	256.078	3.8542	424.967	12.7961	1484.26	70.375
370M1-16TW1 - 4	871.174	823.838	1.05746	0.0416913	0.000566983	0.330499	0.0109568	0.0567877	0.0014181	263.308	3.50873	289.947	8.36201	483.375	55.55
370M1-16TW1 - 5	189.242	254.417	0.743828	0.0413235	0.000602734	0.309862	0.00921853	0.0544638	0.0016943	261.032	3.73129	274.074	7.14617	390.79	68.51
370M1-16TW1 - 6	1177.85	788.192	1.49436	0.0396545	0.000391424	0.361545	0.0226094	0.0654624	0.00365652	250.691	2.42704	313.367	16.8627	790.74	84.255
370M1-16TW1 - 7	412.349	773.299	0.533234	0.0397796	0.000421405	0.300426	0.00698037	0.0545652	0.00127306	251.467	2.61262	266.733	5.45038	394.495	56.475
370M1-16TW1 - 8	104.406	148.598	0.702607	0.040356	0.000562103	0.297892	0.0130386	0.0537036	0.00245451	255.039	3.48299	264.752	10.2009	366.72	101.84
370M1-16TW1 - 9	477.217	776.781	0.614352	0.0406035	0.000433588	0.29904	0.00644048	0.0531669	0.00104465	256.573	2.68603	265.65	5.03418	344.5	44.44
370M1-16TW1 - 10	800.374	705.417	1.13461	0.0411478	0.00050601	0.320814	0.00687026	0.0563306	0.00110311	259.944	3.13303	282.528	5.2816	464.86	44.44
370M1-16TW1 - 11	278.622	434.518	0.64122	0.0398682	0.00048842	0.353097	0.00976955	0.0638448	0.00159266	252.016	3.02784	307.048	7.33133	744.45	52.6175
370M1-16TW1 - 12	621.644	582.358	1.06746	0.0349224	0.000785019	0.377625	0.016508	0.0790242	0.00414274	221.283	4.8898	325.289	12.1679	1172.22	104.16
370M1-16TW1 - 13	92.3606	105.803	0.872952	0.0155609	0.000310331	0.326682	0.0176592	0.153931	0.00865233	99.5394	1.96987	287.03	13.5164	2389.82	95.6775
370M1-16TW1 - 14	142.033	68.3241	2.07881	0.0529722	0.000953728	0.376299	0.0207434	0.0516449	0.00271716	332.744	5.83883	324.311	15.3049	333.39	122.205
370M1-16TW1 - 15	1967.31	1355.2	1.45168	0.0413551	0.000465336	0.317748	0.00692614	0.0554009	0.00101853	261.227	2.88062	280.168	5.33695	427.825	45.365
370M1-16TW1 - 16	474.917	428.688	1.10784	0.0407109	0.00055659	0.329593	0.0115253	0.0581214	0.00166156	257.238	3.44765	289.255	8.80188	600.025	58.325
370M1-16TW1 - 17	591.671	493.697	1.19845	0.0400865	0.000675262	0.363234	0.0146767	0.0658119	0.00297747	253.369	4.18525	314.626	10.9321	1200	95.21
370M1-16TW1 - 18	75.8076	282.527	0.26832	0.293987	0.00482407	4.58597	0.0838525	0.112869	0.00129112	1661.42	24.0328	1746.72	15.2433	1845.99	54.17
370M1-16TW1 - 19	268.8	122.991	2.18552	0.0453614	0.000881541	0.721262	0.0296835	0.116361	0.00544748	285.98	5.43619	551.411	17.5122	1901.85	84.4175
370M1-16TW1 - 20	137.29	241.743	0.567918	0.0416266	0.000521468	0.312413	0.00981427	0.054357	0.0016371	262.907	3.22726	276.049	7.59322	387.09	68.5125
370M1-16TW1 - 21	2527.16	1952.06	1.29461	0.0474677	0.000457536	0.43981	0.0111954	0.0669306	0.00161208	298.956	2.81581	370.119	7.89541	835.18	50.7675
370M1-16TW1 - 22	956.82	852.881	1.12187	0.0416157	0.000542678	0.32189	0.00777096	0.0557809	0.0010682	262.84	3.35856	283.355	5.96917	442.64	10.185
370M1-16TW1 - 23	168.808	316.577	0.533228	0.0413665	0.000482619	0.336058	0.0126444	0.0588341	0.00214421	261.298	2.98758	294.18	9.60984	561.145	79.6175
370M1-16TW1 - 24	201.383	179.789	1.12011	0.0406151	0.00070772	0.304553	0.0137832	0.0543946	0.0024347	256.645	4.38419	269.95	10.7284	387.09	99.99
370M1-16TW1 - 25	326.474	335.187	0.974006	0.040832	0.000585866	0.316041	0.00905616	0.0561485	0.00151755	257.988	3.62858	278.853	6.98733	457.45	59.2525
170M1-13TW1 - 1	619.525	784.024	0.790186	0.0404145	0.000463348	0.283795	0.00597133	0.0507643	0.00101508	255.401	2.87091	253.664	4.72289	231.55	46.2875
170M1-13TW1 - 2	655.363	1282.95	0.510824	0.0405833	0.000453516	0.294269	0.00522183	0.0524009	0.000862135	256.448	2.80953	261.914	4.09666	301.91	37.0325
170M1-13TW1 - 3	751.927	1282.48	0.586309	0.0412628	0.000471958	0.299054	0.00471435	0.0524126	0.000765299	260.656	2.92187	265.661	3.68491	301.91	5.555
170M1-13TW1 - 4	364.162	731.508	0.497824	0.0415245	0.00044672	0.307775	0.0061286	0.0535351	0.0009844	262.275	2.76493	272.455	4.7584	350.055	40.735
170M1-13TW1 - 5	370.396	709.454	0.522087	0.0416008	0.000568387	0.301447	0.00737658	0.0521984	0.00103381	262.748	3.51772	267.53	5.75523	294.505	41.6625
170M1-13TW1 - 6	682.57	1554.14	0.439195	0.0415827	0.000828033	0.297173	0.00813926	0.051597	0.000985591	262.636	5.12475	264.19	6.37122	333.39	37.96
170M1-13TW1 - 7	383.992	795.065	0.482969	0.0415283	0.000554197	0.304686	0.00683028	0.0530036	0.00105282	262.299	3.43014	270.054	5.31577	327.835	44.44
170M1-13TW1 - 8	413.217	788.653	0.523953	0.0414239	0.000531726	0.304633	0.00617429	0.0532791	0.00106395	261.653	3.29138	270.012	4.80542	338.945	46.2925
170M1-13TW1 - 9	472.199	832.16	0.567438	0.0416802	0.000627474	0.312147	0.00789159	0.0540376	0.00111384	263.239	3.88311	275.844	6.10685	372.275	46.2925
170M1-13TW1 - 10	219.532	349.505	0.628122	0.0405304	0.000520304	0.290864	0.00837066	0.0520127	0.00148185	256.12	3.22345	259.239	6.58439	287.1	64.8075
170M1-13TW1 - 11	398.118	679.996	0.58547	0.0407891	0.000851056	0.355701	0.0516793	0.0576579	0.00390518	257.722	5.27125	309	38.7251	516.705	148.127
170M1-13TW1 - 12	501.207	793.065	0.631988	0.0405245	0.000390136	0.306863	0.00731374	0.054703	0.00119647	256.083	2.41703	271.746	5.68256	466.71	52.7725
170M1-13TW1 - 13	323.099	610.537	0.529204	0.0415097	0.000534261	0.299983	0.00651602	0.0524341	0.00107483	262.184	3.3068	266.387	5.08954	305.615	46.2925
170M1-13TW1 - 14	644.675	1183.82	0.544574	0.0412882	0.000455762	0.302001	0.00554537	0.0528411	0.000766742	260.813	2.82154	267.962	4.32466	320.43	33.33
170M1-13TW1 - 15	738.299	1023.06	0.721656	0.0398738	0.000411676	0.30022	0.00812203	0.0544191	0.00132509	252.051	2.55207	266.572	6.34284	387.09	55.55
170M1-13TW1 - 16	363.828	704.302	0.51658	0.0408849	0.000708523	0.319942	0.00962079	0.0563786	0.00114128	258.316	4.38803	281.858	7.40105	477.82	50.92
170M1-13TW1 - 17	861.652	1028.03	0.838159	0.0405346	0.000424579	0.328799	0.00956068	0.0585099	0.00144026	256.146	2.63039	288.649	7.30578	550.035	58.3225
170M1-13TW1 - 18	378.262	722.861	0.523285	0.0413205	0.000460769	0.29723	0.00738358	0.0521232	0.00120146	261.013	2.85244	264.234	5.77943	300.06	51.8475
170M1-13TW1 - 19	644.622	831.715	0.775051	0.0406243	0.000550811	0.342846	0.0114951	0.0613564	0.00216889	256.702	3.41214	299.326	8.69211	651.56	76.6825
170M1-13TW1 - 20	154.599	230.997	0.669271	0.0642689	0.000884936	0.481351	0.0123418	0.0543311	0.00122106	401.535	5.36017	398.999	8.45984	383.385	45.365
170M1-13TW1 - 21	342.788	689.291	0.497306	0.0411697	0.000454596	0.285425	0.00575778	0.0502569	0.000905482	260.079	2.81464	254.952	4.54821	205.63	45.36
170M1-13TW1 - 22	886.342	1142.59	0.775729	0.0409638	0.000458456	0.2908	0.00522813	0.051399	0.00074489	258.804	2.83909	259.189	4.11263	257.47	33.33
170M1-13TW1 - 23	499.411	898.537	0.555804	0.0405574	0.000680309	0.282047	0.0136298	0.0506236	0.00285075	256.287	4.21462	252.28	10.7952	233.4	131.463
170M1-13TW1 - 24	357.076	686.874	0.519857	0.0405005	0.000581683	0.292696	0.00685877	0.0523893	0.00104027	255.934	3.60381	260.679	5.38745	301.91	44.44
170M1-13TW1 - 25	468.423	899.804	0.520584	0.0347079	0.000548465	0.284609	0.00704395	0.0601275	0.00170866	219.946	3.41704	254.307	5.56775	609.28	93.505
XHS-170E0-5TW1 - 1	203.601	723.006	0.281604	0.0408981	0.000639099	0.294755	0.00857037	0.0521198	0.00132766	258.397	3.95802	262.295	6.72122	300.06	57.4
XHS-170E0-5TW1 - 2	104.327	76.3648	1.36617	0.0409467	0.000741411	0.307432	0.0171956	0.0548071	0.00306073	258.698	4.59144	272.189	13.3553	405.605	124.06
XHS-170E0-5TW1 - 3	141.134	551.267	0.256018	0.0403807	0.000507034	0.298144	0.00673029	0.0534398	0.00106386	255.192	3.14169	264.95	5.26435	346.35	44.44
XHS-170E0-5TW1 - 4	109.512	275.335	0.39774	0.0410414	0.000668908	0.308291	0.00915408	0.0543277	0.00140626	259.285	4.14206	272.856	7.10473	383.385	59.255
XHS-170E0-5TW1 - 5	2548.71	2670.8	0.954289	0.0410863	0.000571843	0.300374	0.00863993	0.052788	0.00123948	259.563	3.54085	266.692	6.7465	320.43	53.6975
XHS-170E0-5TW1 - 6	353.492	1033.72	0.341962	0.040542	0.000492415	0.294715	0.00594511	0.0526832	0.00100256	256.192	3.05063	262.264	4.6625	322.28	47.2175
XHS-170E0-5TW1 - 7	366.754	994.208	0.368891	0.0410013	0.000531747	0.307582	0.00705887	0.054261	0.00109718	259.037	3.29285	272.305	5.48151	388.94	41.6625
XHS-170E0-5TW1 - 8	181.688	194.918	0.932123	0.0520427	0.000765206	0.417744	0.0128953	0.0584845	0.00180745	327.05	4.68882	354.436	9.23584	546.33	66.655
XHS-170E0-5TW1 - 9	207.136	626.996	0.330362	0.0407217	0.000526493	0.292542	0.00723556	0.052058	0.00119354	257.305	3.26119	260.558	5.6841	287.1	51.8475
XHS-170E0-5TW1 - 10	308.427	928.969	0.33201	0.0410448	0.000551629	0.289546	0.0060051	0.0511271	0.000988018	259.306	3.41583	258.202	4.72842	255.62	44.4375
XHS-170E0-5TW1 - 11	241.751	688.945	0.350901	0.0408029	0.00052233	0.356817	0.0119827	0.0630338	0.00190454	257.808	3.23515	309.836	8.96759	709.27	64.8075
XHS-170E0-5TW1 - 12	265.317	786.916	0.337161	0.0409485	0.000558181	0.300814	0.00653695	0.053205	0.0010148	258.71	3.45672	267.035	5.10262	344.5	47.2175
XHS-170E0-5TW1 - 13	1380.38	1202.11	1.1483	0.0411787	0.000560621	0.317274	0.00678551	0.0557442	0.00101471	260.135	3.47106	279.804	5.23046	442.64	8.3325
XHS-170E0-5TW1 - 14	329.776	846.556	0.389549	0.0412592	0.000545686	0.29213	0.00681457	0.0512139	0.00105179	260.633	3.37833	260.235	5.35508	250.065	43.5125
XHS-170E0-5TW1 - 15	189.363	372.397	0.508498	0.0408215	0.000538821	0.298394	0.00956994	0.0528727	0.00163434	257.923	3.33724	265.145	7.48412	324.13	70.3625
XHS-170E0-5TW1 - 16	226.606	639.528	0.354332	0.0410261	0.000575938	0.297687	0.00778286	0.0524652	0.00120015	259.19	3.56642	264.592	6.08982	305.615	56.475
XHS-170E0-5TW1 - 17	395.786	1065.5	0.371455	0.0411771	0.00195096	0.615091	0.0399325	0.108219	0.00735566	260.125	12.0793	486.766	25.1101	1769.44	124.385
XHS-170E0-5TW1 - 18	347.156	930.295	0.373168	0.0408329	0.000424364	0.280612	0.0054099	0.0496861	0.000887712	257.994	2.6283	251.143	4.28948	188.97	10.1825
XHS-170E0-5TW1 - 19	239.134	686.435	0.348372	0.040606	0.000465708	0.289497	0.00652088	0.0515335	0.00105244	256.588	2.885	258.163	5.13476	264.88	46.29
XHS-170E0-5TW1 - 20	540.134	1332.58	0.405329	0.0412043	0.000468993	0.2925	0.00540304	0.0513658	0.00086963	260.293	2.90368	260.525	4.24463	257.47	38.8825
XHS-170E0-5TW1 - 21	180.688	531.925	0.339687	0.0403783	0.000515125	0.278672	0.00709381	0.0499193	0.00117147	255.178	3.19183	249.604	5.63319	190.82	27.7725
XHS-170E0-5TW1 - 22	299.061	514.583	0.581172	0.0412331	0.00100766	0.312523	0.00827657	0.0554139	0.00140617	260.472	6.23857	276.135	6.40294	427.825	55.55
XHS-170E0-5TW1 - 23	1593.87	1453.58	1.09651	0.0410832	0.000649436	0.298305	0.00673664	0.0524573	0.000883359	259.544	4.02132	265.075	5.26866	305.615	38.885
XHS-170E0-5TW1 - 24	164.562	530.712	0.310077	0.0410833	0.000595605	0.287331	0.00810022	0.0504407	0.00123627	259.545	3.688	256.456	6.38914	216.74	83.32
XHS-170E0-5TW1 - 25	2800.71	2255.22	1.24188	0.0406713	0.00105898	0.281422	0.00927873	0.050012	0.00135606	256.992	6.55982	251.785	7.35248	194.525	62.95
XHS-170E0-5TW1 - 26	146.656	330.994	0.443078	0.0405415	0.000529364	0.28169	0.00841817	0.0502574	0.00140966	256.188	3.27954	251.998	6.66916	205.63	97.2075
SH08-TW1 - 1	543.428	996.309	0.545441	0.0409887	0.000500801	0.29106	0.0064091	0.0513008	0.000944347	258.958	3.10125	259.394	5.04062	253.77	40.735
SH08-TW1 - 2	580.51	1404.89	0.413207	0.0400837	0.000441193	0.285537	0.00605506	0.0515312	0.00101259	253.352	2.7345	255.04	4.78264	264.88	44.44
SH08-TW1 - 3	509.206	1103.96	0.461253	0.0404373	0.000546525	0.288897	0.00569079	0.0517374	0.000863559	255.543	3.3862	257.691	4.48319	272.285	43.515
SH08-TW1 - 4	208.028	626.676	0.331955	0.0405682	0.000608418	0.303066	0.00765809	0.0543895	0.00145794	256.354	3.76921	268.792	5.96746	387.09	65.735
SH08-TW1 - 5	455.22	1188.88	0.3829	0.0407549	0.000534646	0.287352	0.00565849	0.0510279	0.000849966	257.511	3.31158	256.473	4.46309	242.66	34.2525
SH08-TW1 - 6	237.279	633.751	0.374404	0.0413096	0.00056866	0.313225	0.00858055	0.0547442	0.00128569	260.945	3.52039	276.678	6.63455	466.71	51.8475
SH08-TW1 - 7	55.8085	135.391	0.412204	0.0346888	0.0010879	0.335102	0.0267943	0.0696832	0.00480077	219.827	6.77795	293.454	20.3805	920.37	141.205
SH08-TW1 - 8	768.432	1325.16	0.57988	0.0404003	0.00048305	0.293637	0.00621552	0.0526085	0.000974778	255.314	2.99302	261.418	4.87863	322.28	10.185
SH08-TW1 - 9	448.036	837.428	0.535014	0.0404322	0.00040447	0.285999	0.00618848	0.0512621	0.00109397	255.511	2.50606	255.405	4.88626	253.77	45.3625
SH08-TW1 - 10	705.074	1175.59	0.59976	0.0406795	0.000439987	0.293032	0.0048916	0.0522636	0.000853946	257.044	2.72547	260.943	3.84126	298.21	43.515
SH08-TW1 - 11	344.165	326.158	1.05521	0.0343486	0.000333515	0.224101	0.00822596	0.0472119	0.00171051	217.707	2.07858	205.317	6.82348	61.205	81.475
SH08-TW1 - 12	413.805	988.03	0.418818	0.040555	0.000445089	0.288464	0.00513188	0.0515716	0.000842755	256.272	2.7574	257.35	4.04424	264.88	37.0325
SH08-TW1 - 13	586.648	1003	0.584891	0.0405075	0.000525491	0.281043	0.00637209	0.050221	0.000956901	255.978	3.25565	251.485	5.0507	205.63	47.2125
SH08-TW1 - 14	536.772	1218.26	0.440605	0.0404856	0.000596772	0.28709	0.00773551	0.0513083	0.00116071	255.843	3.69735	256.266	6.1026	253.77	47.215
SH08-TW1 - 15	136.971	218.826	0.625938	0.0349644	0.000835843	0.361307	0.0237636	0.0747262	0.00412636	221.544	5.20616	313.19	17.7268	1061.12	111.115
SH08-TW1 - 16	1187.61	1493.94	0.794951	0.040409	0.000511429	0.287007	0.00519418	0.0515243	0.000815203	255.368	3.16883	256.201	4.09797	264.88	37.0325
SH08-TW1 - 17	1026.02	901.378	1.13828	0.0489297	0.000464931	0.383548	0.00690036	0.0567161	0.000909181	307.947	2.85733	329.645	5.0642	479.67	30.5525
SH08-TW1 - 18	264.564	655.066	0.403874	0.0797175	0.00104003	0.622143	0.0111443	0.0564772	0.000778006	494.436	6.20946	491.19	6.97593	472.265	31.4775
SH08-TW1 - 19	609.006	1046.65	0.581863	0.0403924	0.000363911	0.287606	0.00527069	0.0515419	0.000925141	255.264	2.25485	256.674	4.15639	264.88	36.1075
SH08-TW1 - 20	761.145	1343.84	0.566394	0.0404218	0.000393244	0.292902	0.00499674	0.0524209	0.00085822	255.447	2.43652	260.841	3.92422	305.615	37.0325
SH08-TW1 - 21	127.652	221.738	0.57569	0.0365402	0.00051397	0.357579	0.0159497	0.0709454	0.00319403	231.352	3.19646	310.406	11.9299	966.665	97.2275
SH08-TW1 - 22	116.634	212.488	0.548898	0.0345198	0.000487826	0.240974	0.00900322	0.0507668	0.00188966	218.774	3.0398	219.218	7.36669	231.55	89.8
SH08-TW1 - 23	2046.61	1882.8	1.087	0.0405645	0.000551911	0.319297	0.00685067	0.0566917	0.000887704	256.331	3.41915	281.362	5.27259	479.67	33.33
SH08-TW1 - 24	161.693	400.337	0.403892	0.0346363	0.000481395	0.285035	0.00808791	0.0593424	0.00148175	219.5	2.99938	254.644	6.39082	588.915	53.695
SH08-TW1 - 25	621.612	1233.28	0.504032	0.040248	0.000528997	0.298201	0.00519163	0.0535283	0.000816681	254.37	3.27819	264.994	4.06063	350.055	35.1825
120M1- 1	61.5133	90.3863	0.68056	0.0347705	0.000643919	0.252098	0.0140428	0.0527834	0.00280588	220.336	4.01149	228.279	11.3885	320.43	120.353
120M1- 2	92.5159	76.3969	1.21099	0.034997	0.000633915	0.247242	0.0139575	0.0518274	0.0028775	221.747	3.9483	224.333	11.3633	275.99	160.165
120M1- 3	86.8207	125.688	0.690766	0.0345903	0.000494973	0.2844	0.0125198	0.0599537	0.0025895	219.214	3.08412	254.142	9.89786	611.13	94.43
120M1- 4	95.2303	88.4523	1.07663	0.0344433	0.000682686	0.503605	0.0264308	0.106898	0.00571799	218.297	4.25434	414.14	17.8505	1747.21	93.5225
120M1- 5	83.0306	459.844	0.180562	0.138986	0.0017447	1.50105	0.0303067	0.0783121	0.00155597	838.924	9.87464	930.81	12.3046	1154.63	38.89
120M1- 6	155.84	169.963	0.916907	0.0364339	0.00049873	0.545551	0.0234834	0.108928	0.00493928	230.691	3.102	442.078	15.4291	1783.34	81.945
120M1- 7	82.2552	57.8476	1.42193	0.476835	0.00646093	15.6772	0.558129	0.23592	0.00665354	2513.46	28.2023	2857.33	33.9941	3094.45	44.7525
120M1- 8	67.0424	86.9659	0.770904	0.0359806	0.000770306	0.319834	0.021796	0.0648834	0.0046296	227.87	4.79325	281.775	16.7697	772.225	154.62
120M1- 9	71.6153	107.991	0.66316	0.0343756	0.000607573	0.280858	0.0148831	0.0594272	0.00305253	217.876	3.7865	251.338	11.7989	583.36	111.095
120M1- 10	56.6436	60.9876	0.928772	0.0348195	0.000829059	0.346085	0.0223138	0.0726086	0.00481393	220.641	5.16463	301.772	16.8334	1002.77	135.192
120M1- 11	129.625	133.827	0.968599	0.0957372	0.00944569	6.65747	0.804288	0.445926	0.0210916	589.379	55.572	2067	107.044	4071.91	70.37
120M1- 12	102.356	153.191	0.668156	0.0347147	0.000389313	0.280723	0.0110491	0.0586164	0.0022949	219.989	2.42547	251.231	8.76019	553.74	85.17
120M1- 13	94.4682	88.1679	1.07146	0.0344118	0.00065715	0.259172	0.0139846	0.0550606	0.00294833	218.101	4.09533	233.999	11.2775	413.01	115.73
120M1- 14	236.006	202.378	1.16617	0.0339076	0.000458239	0.370201	0.015058	0.0790347	0.00321994	214.958	2.85712	319.802	11.1592	1173.15	75.77
120M1- 15	258.592	189.543	1.3643	0.058301	0.0012468	0.576976	0.0336784	0.0718069	0.00401903	365.285	7.59464	462.516	21.6881	988.89	119.448
120M1- 16	298.131	393.579	0.757487	0.0368227	0.000546192	0.675416	0.0350968	0.129434	0.00562464	233.109	3.39593	524	21.2735	2090.43	75.77
120M1- 17	555.881	1031.47	0.53892	0.0507414	0.00203709	0.536974	0.0514486	0.0740365	0.0049436	319.072	12.4978	436.428	34.0016	1042.6	135.188
SH02-TW1 - 1	98.2713	143.796	0.68341	0.0347987	0.000582541	0.257493	0.0128332	0.0537679	0.00267064	220.512	3.62901	232.645	10.3628	361.165	111.1
SH02-TW1 - 2	119.924	164.921	0.727162	0.0344902	0.000524284	0.250682	0.0105245	0.0530344	0.00226983	218.59	3.26707	227.13	8.54465	331.54	100.915
SH02-TW1 - 3	58.5595	79.1066	0.740261	0.0344533	0.00063411	0.245832	0.0134141	0.0523001	0.00285793	218.36	3.95159	223.184	10.9333	298.21	125.91
SH02-TW1 - 4	119.708	135.67	0.882349	0.0344563	0.000520984	0.260792	0.0140693	0.0542374	0.00257297	218.378	3.24661	235.305	11.3313	388.94	74.9925
SH02-TW1 - 5	145.592	193.881	0.750936	0.034423	0.00048257	0.245045	0.00893323	0.0519517	0.00198544	218.171	3.00733	222.543	7.28552	283.395	87.0225
SH02-TW1 - 6	41.1621	74.097	0.555516	0.0346632	0.000766763	0.237713	0.0193376	0.0508314	0.00436724	219.668	4.77728	216.546	15.8653	231.55	199.975
SH02-TW1 - 7	42.2848	61.7692	0.684562	0.0343416	0.000594873	0.256082	0.0198426	0.0545256	0.00421511	217.664	3.70748	231.505	16.0416	394.495	178.685
SH02-TW1 - 8	95.266	142.051	0.670648	0.034148	0.000571704	0.234205	0.00934465	0.050269	0.00213643	216.457	3.56375	213.664	7.68801	205.63	98.1325
SH02-TW1 - 9	101.677	155.965	0.65192	0.0340678	0.000491727	0.238955	0.0104038	0.0512153	0.00233071	215.957	3.06545	217.564	8.52664	250.065	105.54
SH02-TW1 - 10	33.7926	57.2506	0.590257	0.0342961	0.000742679	0.230267	0.0174754	0.0494757	0.00386159	217.38	4.62886	210.419	14.4241	168.6	174.05
SH02-TW1 - 11	82.1381	115.166	0.713217	0.0344385	0.000504494	0.236569	0.0126073	0.0500809	0.00284438	218.267	3.14391	215.607	10.3526	198.23	131.463
SH02-TW1 - 12	109.82	95.6541	1.1481	0.0348958	0.000623843	0.226242	0.0134792	0.0477034	0.00294508	221.117	3.88595	207.091	11.1618	83.425	149.975
SH02-TW1 - 13	143.325	211.789	0.676735	0.034317	0.000496604	0.236948	0.0086008	0.0501055	0.00180527	217.511	3.0951	215.919	7.06032	198.23	78.69
SH02-TW1 - 14	47.1036	91.6668	0.513856	0.0344048	0.000676961	0.243922	0.0138926	0.0522998	0.00313559	218.058	4.21882	221.627	11.3407	298.21	132.39
SH02-TW1 - 15	108.295	296.423	0.36534	0.0346103	0.000577841	0.239823	0.00835977	0.0501919	0.00165275	219.338	3.60039	218.275	6.84654	211.185	77.765
SH02-TW1 - 16	392.506	363.188	1.08072	0.0342851	0.000507528	0.237209	0.00740572	0.0501775	0.00152973	217.312	3.16328	216.132	6.07798	211.185	70.3575
SH02-TW1 - 17	135.066	172.994	0.780758	0.0345443	0.000549623	0.232085	0.00918386	0.0486434	0.00180722	218.927	3.42479	211.918	7.56872	131.57	87.025
SH02-TW1 - 18	128.205	145.971	0.878291	0.0344283	0.000601186	0.225214	0.0113834	0.0478232	0.00240467	218.204	3.74651	206.24	9.43414	100.09	105.54
SH02-TW1 - 19	76.4254	84.4507	0.90497	0.0347811	0.000533614	0.231911	0.0134213	0.0485641	0.00282975	220.403	3.32428	211.775	11.0628	127.865	129.605
SH02-TW1 - 20	291.847	231.841	1.25883	0.0345101	0.000507895	0.223814	0.00816118	0.0470197	0.00165775	218.714	3.16488	205.079	6.77133	50.095	81.475
SH02-TW1 - 21	157.466	245.622	0.641092	0.0347026	0.00044455	0.251457	0.00950911	0.0523977	0.00184307	219.913	2.76964	227.759	7.71546	301.91	84.25
SH02-TW1 - 22	67.2995	85.9897	0.782647	0.0350079	0.000706497	0.219739	0.0146307	0.046197	0.00305781	221.815	4.40033	201.693	12.1801	9.36	157.39
SH02-TW1 - 23	75.2803	89.6394	0.839812	0.0348812	0.000667483	0.253853	0.0153299	0.0536997	0.00335628	221.026	4.15784	229.701	12.415	366.72	142.577
SH02-TW1 - 24	72.8526	87.3272	0.834248	0.0344168	0.000671871	0.248155	0.0152318	0.0519275	0.00293489	218.133	4.18706	225.076	12.3918	283.395	129.613
SH02-TW1 - 25	42.0031	59.3186	0.708094	0.0330478	0.000682047	0.243676	0.0179339	0.0545648	0.00404348	209.595	4.2561	221.426	14.6429	394.495	166.65
SH06-1TW1 - 1	35.3175	70.3445	0.502065	0.0346436	0.000651829	0.259015	0.0169802	0.0547899	0.00362809	219.546	4.06126	233.873	13.6952	466.71	145.355
SH06-1TW1 - 2	66.1165	125.519	0.526744	0.0345954	0.000520444	0.231759	0.011668	0.0489987	0.00244893	219.245	3.24281	211.65	9.61864	146.38	113.873
SH06-1TW1 - 3	96.9816	87.7988	1.10459	0.0341057	0.000909973	0.474842	0.0301334	0.103238	0.00685546	216.193	5.6726	394.528	20.7488	1683.34	127.93
SH06-1TW1 - 4	220.396	301.285	0.73152	0.0341976	0.000559321	0.244878	0.0117763	0.0517804	0.00231718	216.766	3.48639	222.407	9.6056	275.99	103.69
SH06-1TW1 - 5	211.966	220.394	0.961761	0.0350621	0.000668341	0.312095	0.0173604	0.064947	0.00384352	222.153	4.16246	275.803	13.4354	772.225	124.835
SH06-1TW1 - 6	50.4467	106.546	0.473473	0.03435	0.00060185	0.226186	0.0134263	0.047818	0.00279954	217.716	3.75093	207.045	11.1185	100.09	133.31
SH06-1TW1 - 7	158.326	228.818	0.691928	0.0342301	0.000477723	0.226255	0.00833566	0.0480587	0.00168429	216.969	2.97768	207.102	6.90233	101.94	83.325
SH06-1TW1 - 8	189.836	211.857	0.896056	0.0341276	0.000482172	0.23005	0.00948313	0.0491226	0.001995	216.33	3.0057	210.24	7.8283	153.79	99.06
SH06-1TW1 - 9	97.1926	170.45	0.570211	0.0346575	0.000615335	0.25099	0.0129231	0.0529502	0.00272188	219.632	3.83383	227.38	10.4896	327.835	116.653
SH06-1TW1 - 10	85.6643	168.066	0.509706	0.0345056	0.000501605	0.258406	0.0165488	0.0541108	0.0034701	218.686	3.1257	233.382	13.3537	375.98	144.43
SH06-1TW1 - 11	137.078	257.575	0.532187	0.0345971	0.000497557	0.241242	0.00831229	0.0508273	0.00172051	219.256	3.1002	219.437	6.79987	231.55	77.765
SH06-1TW1 - 12	46.569	85.9808	0.541622	0.0342995	0.000671792	0.252311	0.0140594	0.0529898	0.00267595	217.401	4.18703	228.452	11.4	327.835	114.802
SH06-1TW1 - 13	68.9524	126.121	0.546715	0.0342247	0.000558334	0.225535	0.0105232	0.0478113	0.00210385	216.935	3.48014	206.506	8.71891	100.09	90.73
SH06-1TW1 - 14	194.374	219.472	0.885642	0.0344992	0.000484981	0.241324	0.00878129	0.0509002	0.00179709	218.646	3.02213	219.504	7.18307	235.25	81.4675
SH06-1TW1 - 15	67.9757	111.568	0.609277	0.0343914	0.000593353	0.217478	0.0122928	0.0469528	0.0028776	217.974	3.69782	199.809	10.2526	55.65	131.47
SH06-1TW1 - 16	116.819	188.24	0.620588	0.0348915	0.000546955	0.24436	0.0109042	0.0508523	0.00216971	221.09	3.40702	221.985	8.89791	235.25	99.985
SH06-1TW1 - 17	63.6947	121.234	0.525385	0.0343546	0.000493206	0.233498	0.0111908	0.0492659	0.00220307	217.745	3.07381	213.082	9.21223	161.195	103.688
SH06-1TW1 - 18	139.536	176.377	0.791124	0.0347075	0.000518865	0.246699	0.00834785	0.051925	0.00184417	219.944	3.23262	223.892	6.79907	283.395	81.4675
SH06-1TW1 - 19	177.327	258.691	0.685478	0.034592	0.000503324	0.238692	0.00833379	0.050164	0.00172534	219.224	3.13615	217.349	6.83149	211.185	79.615
SH06-1TW1 - 20	66.5253	129.399	0.51411	0.0345484	0.000540362	0.228926	0.01089	0.0482862	0.00226603	218.953	3.36707	209.312	8.99792	122.31	98.13
SH06-1TW1 - 21	158.552	209.03	0.758515	0.0344084	0.000561586	0.231019	0.00869935	0.0490891	0.00192494	218.08	3.4998	211.04	7.17561	153.79	92.58
SH06-1TW1 - 22	190.189	337.574	0.563401	0.0347391	0.000441376	0.247139	0.0077003	0.0518117	0.00164052	220.141	2.74977	224.249	6.26944	275.99	67.5825
SH06-1TW1 - 23	133.47	196.722	0.678469	0.0350188	0.000576847	0.25291	0.0120545	0.0524067	0.00231543	221.883	3.59278	228.937	9.76948	301.91	134.24
SH06-1TW1 - 24	125.368	204.565	0.612851	0.0344524	0.000464951	0.219031	0.00838282	0.0462632	0.00179055	218.354	2.89744	201.103	6.98252	13.06	88.88
SH06-1TW1 - 25	126.248	202.209	0.624346	0.0345978	0.000526399	0.245582	0.00979706	0.0518153	0.00210369	219.26	3.27991	222.981	7.98661	275.99	89.8
120M2 - 1	79.755	184.066	0.433295	0.0406009	0.000519697	0.284222	0.0106858	0.0506458	0.0018219	256.556	3.21947	254.001	8.449	233.4	83.32
120M2 - 2	83.6836	168.853	0.495601	0.0344021	0.000485717	0.251227	0.00890271	0.0532054	0.00199136	218.041	3.027	227.572	7.22476	344.5	85.1775
120M2 - 3	57.4619	134.932	0.425857	0.0344347	0.000407341	0.232414	0.00971945	0.0489402	0.00202099	218.244	2.53847	212.189	8.008	146.38	91.6525
120M2 - 4	136.812	210.401	0.650246	0.0341029	0.000458027	0.249193	0.00826921	0.053353	0.00188059	216.176	2.85526	225.921	6.72157	342.65	79.6225
120M2 - 5	162.766	236.345	0.688677	0.0340739	0.00045083	0.247468	0.00820575	0.0528425	0.00174283	215.995	2.81047	224.517	6.67921	320.43	69.4375
120M2 - 6	114.207	244.973	0.466205	0.0343602	0.000481011	0.278771	0.0104118	0.0585826	0.00192046	217.78	2.99779	249.682	8.26749	550.035	70.36
120M2 - 7	83.1795	173.049	0.48067	0.0349364	0.000481129	0.250355	0.00974826	0.0516476	0.00179395	221.37	2.99686	226.864	7.91649	333.39	79.615
120M2 - 8	73.8178	146.839	0.502713	0.0346771	0.000522934	0.206879	0.00951312	0.0436076	0.00199564	219.754	3.25807	190.931	8.00383	error	error
120M2 - 9	80.8225	163.07	0.495631	0.0349206	0.000496026	0.241223	0.011192	0.0503597	0.00231159	221.271	3.0897	219.421	9.15589	213.035	110.17
120M2 - 10	74.3141	158.705	0.468254	0.0350122	0.000525439	0.244558	0.00919098	0.050798	0.0018097	221.842	3.27262	222.146	7.49867	231.55	87.95
120M2 - 11	121.248	218.775	0.554211	0.0340601	0.000418515	0.288613	0.0119825	0.0616443	0.00253476	215.909	2.60906	257.467	9.44211	661.125	87.0225
120M2 - 12	136.24	241.17	0.564911	0.0349322	0.000422509	0.320956	0.00982628	0.0664167	0.00184968	221.344	2.63174	282.638	7.55333	820.37	57.405
120M2 - 13	60.6005	155.168	0.390547	0.0341702	0.000505372	0.236209	0.00982632	0.0503515	0.00209018	216.596	3.1502	215.311	8.0712	213.035	91.6525
120M2 - 14	91.4972	142.307	0.642956	0.0340032	0.000484993	0.248378	0.0135174	0.0535579	0.00303454	215.554	3.02365	225.258	10.9949	353.76	127.765
120M2 - 15	68.6207	156.156	0.439436	0.0345977	0.000477476	0.221654	0.00961539	0.046295	0.00190551	219.26	2.97508	203.285	7.99204	13.06	96.29
120M2 - 16	250.339	313.785	0.797806	0.0350109	0.000432529	0.248781	0.00795764	0.0513965	0.00155525	221.834	2.69394	225.586	6.47044	257.47	70.3575
120M2 - 17	78.7039	159.457	0.493575	0.0347743	0.000466669	0.248257	0.00948347	0.0520056	0.00198158	220.36	2.90724	225.159	7.71439	287.1	88.875
120M2 - 18	75.9934	148.973	0.510115	0.0344478	0.000555838	0.262875	0.0111505	0.0556424	0.00237519	218.326	3.46384	236.981	8.96549	438.935	96.2875
120M2 - 19	63.5527	146.958	0.432456	0.0343509	0.000479114	0.246296	0.0103372	0.0525278	0.00224654	217.722	2.986	223.563	8.42211	309.32	128.69
120M2 - 20	87.8147	180.09	0.487616	0.0339781	0.000465644	0.238034	0.00858479	0.0511081	0.00186138	215.398	2.90309	216.809	7.041	255.62	80.5425
120M2 - 21	108.341	183.54	0.590286	0.0344273	0.000428911	0.233667	0.00893959	0.0489534	0.00170582	218.198	2.67292	213.221	7.35795	146.38	86.0975
120M2 - 22	103.913	203.943	0.509517	0.0342224	0.000452084	0.22381	0.00816994	0.047691	0.00179593	216.921	2.81788	205.076	6.77862	83.425	88.88
120M2 - 23	63.8207	139.219	0.458418	0.0340708	0.000404282	0.253999	0.00932093	0.0544167	0.00202333	215.976	2.5203	229.819	7.54744	387.09	87.955
120M2 - 24	54.1395	100.78	0.537206	0.0347143	0.000635194	0.24146	0.0132601	0.0516226	0.00310845	219.986	3.95735	219.615	10.8458	333.39	171.275
120M2 - 25	73.7399	152.956	0.4821	0.0342756	0.000531929	0.230591	0.00999223	0.0496489	0.00221688	217.252	3.3154	210.686	8.24496	188.97	100.91
